# Supplementary material for: Colloidal synthesis of urchin-like Fe doped NiSe2 for efficient oxygen evolution
Source: Royal Society of Chemistry journal article supplement (doi:10.1039/c7nr01413a), 2017-01-01
Supplement: c7nr01413a1.pdf [file c7nr01413a1.pdf]

## Supporting Information

### Colloidal synthesis of urchin-like Fe doped NiSe<sub>2</sub> for efficient oxygen evolution

Yeshuang Du,<sup>a</sup> Gongzhen Cheng,<sup>a</sup> Wei Luo<sup>a,b\*</sup>

Table S1 Composition of NiFeSe catalysts

| Catalysts                | 1                                                     | 2                                                     | 3                                                     | 4                                                     |
|--------------------------|-------------------------------------------------------|-------------------------------------------------------|-------------------------------------------------------|-------------------------------------------------------|
| Precursor ratio Ni:Fe:Se | NiFe <sub>0.23</sub> Se <sub>2</sub>                  | NiFe <sub>0.53</sub> Se <sub>2</sub>                  | NiFe <sub>0.75</sub> Se <sub>2</sub>                  | NiFeSe <sub>2</sub>                                   |
| ICP result               | Ni <sub>1.16</sub> Fe <sub>0.27</sub> Se <sub>2</sub> | Ni <sub>1.12</sub> Fe <sub>0.49</sub> Se <sub>2</sub> | Ni <sub>1.06</sub> Fe <sub>0.58</sub> Se <sub>2</sub> | Ni <sub>1.02</sub> Fe <sub>0.88</sub> Se <sub>2</sub> |

Table S2 Comparison of OER catalytic performances with reported metal selenides

| Catalyst                                              | electrolyte | support         | loading<br>(mg/cm <sup>2</sup> ) | J<br>(mA/cm <sup>2</sup> ) | Overpotential<br>(mV) | ref |
|-------------------------------------------------------|-------------|-----------------|----------------------------------|----------------------------|-----------------------|-----|
| Ni <sub>3</sub> Se <sub>2</sub>                       | 0.3 M KOH   | GC              | 0.217                            | 10                         | 290                   | 1   |
| Co <sub>0.13</sub> Ni <sub>0.87</sub> Se <sub>2</sub> | 1 M KOH     | Ti              | 1.67                             | 100                        | 320                   | 2   |
| NiSe <sub>2</sub>                                     | 1 M KOH     | Ti              | 2.5                              | 20                         | 295                   | 3   |
| NiSe <sub>2</sub>                                     | 1 M KOH     | GC              | 1                                | 10                         | 250                   | 4   |
| FeNiSe                                                | 1 M KOH     | FeNi foam       | 4.8                              | 100                        | 264                   | 5   |
| NiSe                                                  | 1 M KOH     | Ni foam         | 2.8                              | 20                         | 270                   | 6   |
| NiSe                                                  | 1 M KOH     | Ni foam         |                                  | 10                         | 320                   | 7   |
| Ni <sub>3</sub> Se <sub>2</sub>                       | 1 M KOH     | CF              | 3                                | 50                         | 340                   | 8   |
| Ni <sub>3</sub> Se <sub>2</sub>                       | 1 M KOH     | Ni foam         | 8.87                             | 20                         | 242                   | 9   |
| (Ni, Co) <sub>0.85</sub> Se                           | 1 M KOH     | carbon<br>cloth | 5                                | 10                         | 255                   | 10  |
| (Ni,Co) <sub>0.85</sub> Se @ NiCo<br>LDH              | 1 M KOH     | carbon<br>cloth | 6                                | 10                         | 216                   | 10  |
| NiSe <sub>2</sub>                                     | 1 M KOH     | Ni foam         |                                  | 50                         | 350                   | 11  |
| Ni <sub>0.5</sub> Fe <sub>0.5</sub> Se <sub>2</sub>   | 1 M KOH     | CFC             |                                  | 50                         | 350                   | 12  |
| CoSe                                                  | 1 M KOH     | GC              | 0.28                             | 10                         | 295                   | 13  |
| Co <sub>7</sub> Se <sub>8</sub>                       | 1 M KOH     | GC              |                                  | 10                         | 290                   | 14  |
| NiCo-selenide                                         | 0.1 M KOH   | CFP             | 0.2                              | 10                         | 393                   | 15  |
| CoSe                                                  | 1 M KOH     | Ti              | 3.8                              | 10                         | 292                   | 16  |
| CoSe                                                  | 0.1 M KOH   | NG              | 0.2                              | 10                         | 366                   | 17  |
| Co <sub>0.85</sub> Se/NiFe-LDH                        | 1 M KOH     | EG              |                                  | 150                        | 270                   | 18  |
| CoSe <sub>2</sub>                                     | 0.1 M KOH   | GC              | 0.142                            | 10                         | 320                   | 19  |

|                                                       |           |         |      |     |     |           |
|-------------------------------------------------------|-----------|---------|------|-----|-----|-----------|
| CoOx–CoSe                                             | 1 M KOH   | Ni foam | 1.7  | 100 | 300 | 20        |
| CeO <sub>2</sub> /CoSe <sub>2</sub>                   | 0.1 M KOH | GC      | 0.2  | 10  | 288 | 21        |
| Ni <sub>0.75</sub> Fe <sub>0.25</sub> Se <sub>2</sub> | 1 M KOH   | CFC     | 1.5  | 100 | 277 | 22        |
| NixFe <sub>1-x</sub> Se <sub>2</sub> -DO              | 1 M KOH   | Ni foam |      | 10  | 195 | 23        |
| Ni <sub>1.12</sub> Fe <sub>0.49</sub> Se <sub>2</sub> | 1 M KOH   | XC-72   | 0.45 | 10  | 227 | this work |

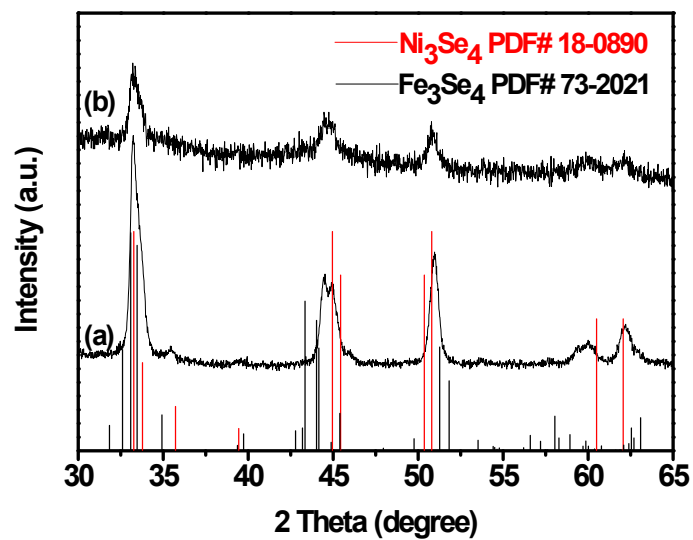

Figure S1. XRD patterns of Ni<sub>1.12</sub>Fe<sub>0.49</sub>Se<sub>2</sub> before (a) and after (b) OER stability test.

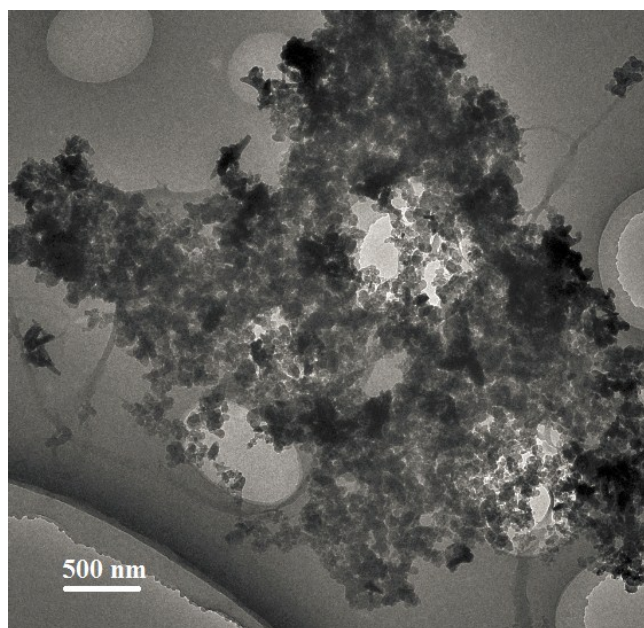

Figure S2. TEM image of Ni<sub>1.12</sub>Fe<sub>0.49</sub>Se<sub>2</sub>/XC-72 after OER stability test.

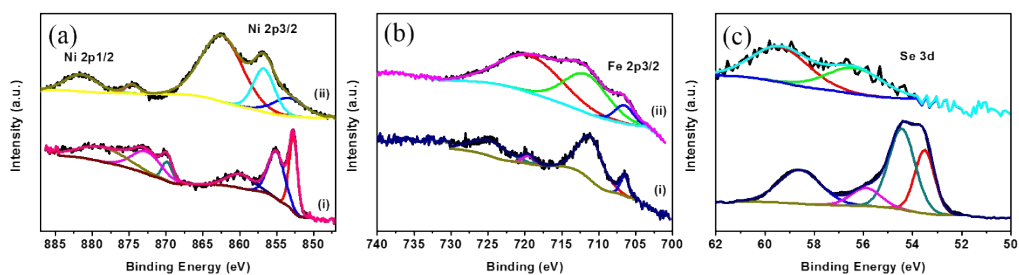

Figure S3. XPS spectra of Ni 2p (a), Fe 2p (b), Se 3d (c) in  $\text{Ni}_{1.12}\text{Fe}_{0.49}\text{e}_2$  catalyst before (i) and after (ii) OER stability test.

## References

- [1] A. T. Swesi, J. Masud and M. Nath, *Energy Environ. Sci.*, 2016, **9**, 1771.
- [2] T. Liu, A. M. Asiri and X. Sun, *Nanoscale*, 2016, **8**, 3911.
- [3] Z. Pu, Y. Luo, A. M. Asiri and X. Sun, *ACS Appl. Mater. Interfaces*, 2016, **8**, 4718.
- [4] I. H. Kwak, H. S. Im, D. M. Jang, Y. W. Kim, K. Park, Y. R. Lim, E. H. Cha, and J. Park, *ACS Appl. Mater. Interfaces*, 2016, **8**, 5327.
- [5] C. Tang, A. M. Asiri and X. Sun, *Chem. Commun.*, 2016, **52**, 4529.
- [6] C. Tang, N. Cheng, Z. Pu, W. Xing, and X. Sun, *Angew. Chem. Int. Ed.*, 2015, **54**, 9351.
- [7] K. Xu, H. Ding, K. Jia, X. Lu, P. Chen, T. Zhou, H. Cheng, S. Liu, C. Wu, and Y. Xie, *Angew. Chem. Int. Ed.*, 2016, **55**, 1710.
- [8] J. Shi, J. Hu, Y. Luo, X. Sun and A. M. Asiri, *Catal. Sci. Technol.*, 2015, **5**, 4954.
- [9] R. Xu, R. Wu, Y. Shi, J. Zhang and B. Zhang, *Nano Energy*, 2016, **24**, 103.
- [10] C. Xia, Q. Jiang, C. Zhao, M. N. Hedhili, and H. N. Alshareef, *Adv. Mater.*, 2016, **28**, 77.
- [11] X. Li, G.-Q. Han, Y.-R. Liu, B. Dong, X. Shang, W.-H. Hu, Y.-M. Chai, Y.-Q. Liu and C.-G. Liu, *Electrochimica Acta*, 2016, **205**, 77.
- [12] J.-Q. Chi, X. Shang, F. Liang, B. Dong, X. Li, Y.-R. Liu, K.-L. Yan, W.-K. Gao, Y.-M. Chai and C.-G. Liu, *Appl. Surf. Sci.*, 2017, **401**, 17.
- [13] M. Liao, G. Zeng, T. Luo, Z. Jin, Y. Wang, X. Kou and D. Xiao, *Electrochimica Acta*, 2016, **194**, 59.
- [14] J. Masud, A. T. Swesi, W. P. R. Liyanage, and M. Nath, *ACS Appl. Mater. Interfaces*, 2016, **8**, 17292.
- [15] X. Zhao, Y. Yang, Y. Li, X. Cui, Y. Zhang and P. Xiao, *J Mater Sci.*, 2016, **51**, 3724.
- [16] T. Liu, Q. Liu, A. M. Asiri, Y. Luo and X. Sun, *Chem. Commun.*, 2015, **51**, 16683.
- [17] M.-R. Gao, X. Cao, Q. Gao, Y.-F. Xu, Y.-R. Zheng, J. Jiang, and S.-H. Yu, *ACS Nano*, 2014, **4**, 3970.
- [18] Y. Hou, M. R. Lohe, J. Zhang, S. Liu, X. Zhuang and X. Feng, *Energy Environ. Sci.*, 2016, **9**, 478.
- [19] Y. Liu, H. Cheng, M. Lyu, S. Fan, Q. Liu, W. Zhang, Y. Zhi, C. Wang, C. Xiao, S. Wei, B. Ye and Y. Xie, *J. Am. Chem. Soc.*, 2014, **136**, 15670.
- [20] X. Xu, P. Du, Z. Chen and M. Huang, *J. Mater. Chem. A*, 2016, **4**, 10933.
- [21] Y.-R. Zheng, M.-R. Gao, Q. Gao, H.-H. Li, J. Xu, Z.-Y. Wu and S.-H. Yu, *Small*, 2015, **11**, 182.
- [22] Z. Wang, J. Li, X. Tian, X. Wang, Y. Yu, K. A. Owusu, L. He and L. Mai, *ACS Appl. Mater. Interfaces*, 2016, **8**, 19386.
- [23] X. Xu, F. Song and X. Hu, *Nat. Commun.*, 7:12324 doi: 10.1038/ncomms12324.
